# Supplementary material for: Gankyrin is a predictive and oncogenic factor in well-differentiated and dedifferentiated liposarcoma
Source: PubMed Central journal article supplement (PMC4253419; doi:10.18632/oncotarget.2375), 2014-08-21
Supplement: oncotarget-05-9065-s001.pdf [file oncotarget-05-9065-s001.pdf]

# Gankyrin is a predictive and oncogenic factor in well-differentiated and dedifferentiated liposarcoma

## Supplementary Material

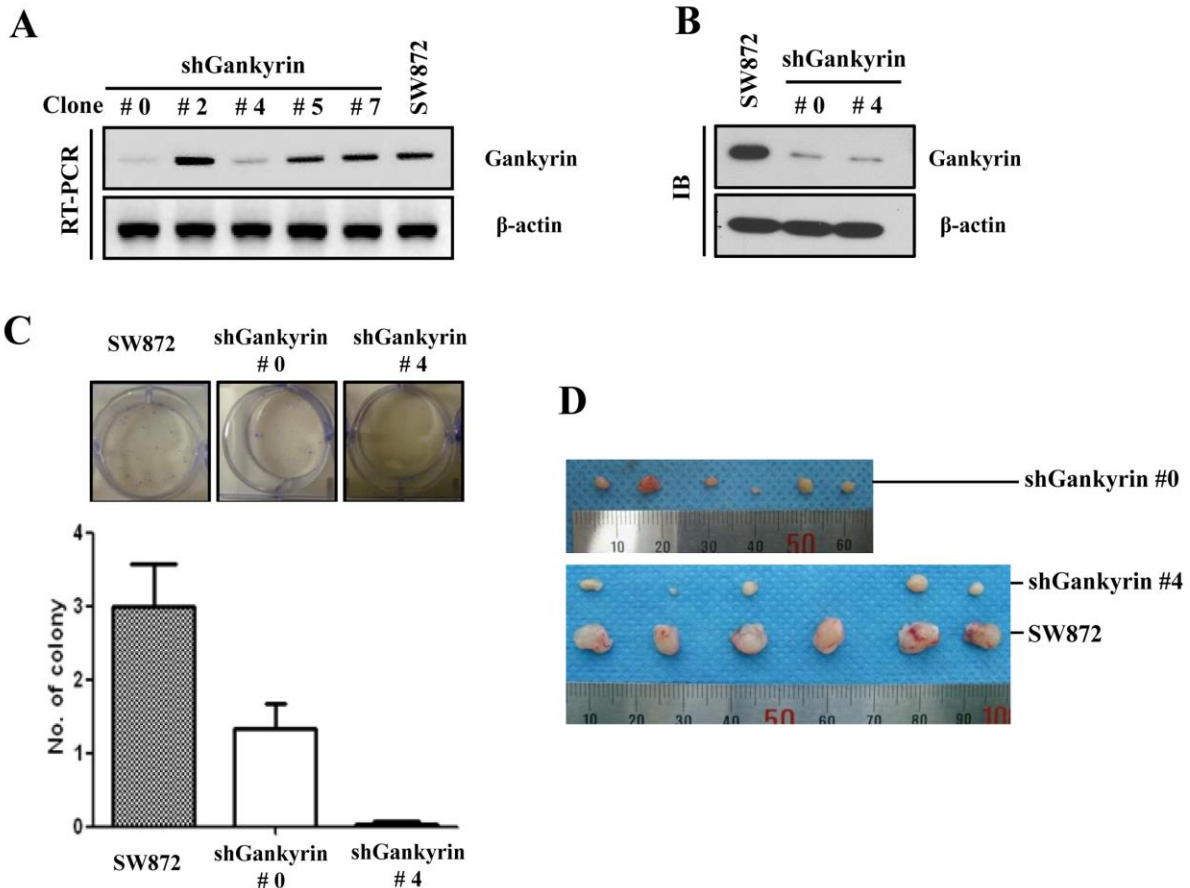

**Supplemental Figure 1: Screening of shDNA clone for the gankyrin knockdown using a lentiviral system.** Representative figure for the RT-PCR and immunoblot assay of gankyrin. SW-872 cells were transduced with five types of lentiviruses containing shGankyrin clones (A), and two types of shGankyrin clones (shGankyrin #0 and #4) were selected for the knockdown of gankyrin (B). (C) Colony forming assay (CFU) of SW872 with or without two shGankyrin clones. (D) *In vivo* tumorigenesis of SW872 cells and SW872 shGankyrin clones. Tumor mass was measured 6~8 weeks after the subcutaneous injection.

**A**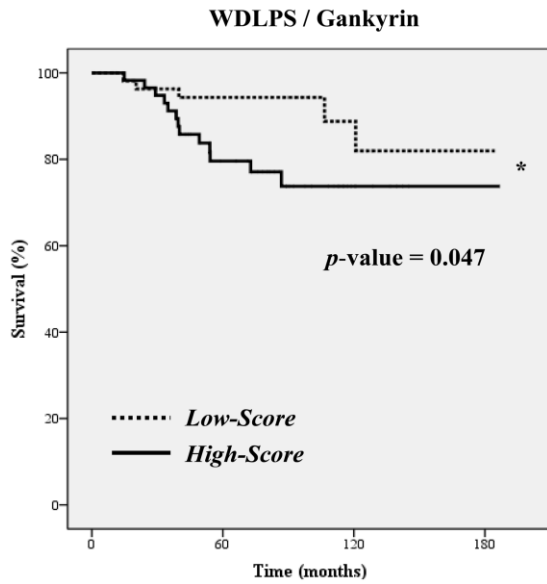**B**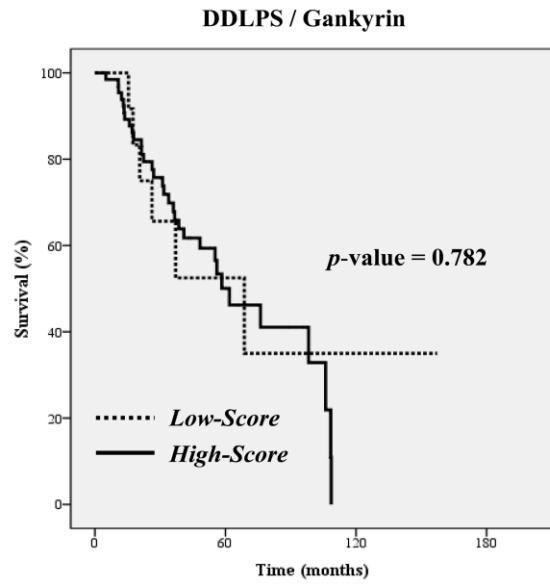

**Supplemental Figure 2: The analysis of overall survival in 204 LPS samples stratified according to WDLPS and DDLPS and gankyrin expression scores. Each WDLPS (A) and DDLPS (B) sample was separately analyzed for overall survival and gankyrin expression score.**

\* denotes statistically significant effects ( $p < 0.05$ ).

## Supplemental Table 1

### Clinical characteristics of liposarcoma patients

| NO. | List    | Age (y) | Sex | Subtype  | Primary /<br>Reccurent | Site                            | Size (cm) | Necrosis | MDM2<br>( IHC ) |
|-----|---------|---------|-----|----------|------------------------|---------------------------------|-----------|----------|-----------------|
| 1   | LPS 131 | 67      | M   | WD/DDLPS | Primary                | Retroperitoneum                 | 10x6      | absent   | Positive        |
| 2   | LPS 851 | 58      | F   | WD/DDLPS | Primary                | Kidney,<br>small bowel          | 10x9.5x8  | >50%     | Positive        |
| 3   | LPS 719 | 63      | M   | WD/DDLPS | Primary                | Retroperitoneum                 | 12x9x7.5  | <50%     | Positive        |
| 4   | LPS 850 | 40      | F   | WD/DDLPS | Primary                | Retroperitoneum                 | 10x10     | absent   | Positive        |
| 5   | LPS 391 | 69      | M   | WD/DDLPS | Primary                | Retroperitoneum                 | 12x7      | absent   | Positive        |
| 6   | LPS 645 | 58      | M   | WD/DDLPS | Reccurent              | colon and<br>small bowel        | 16x11x10  | absent   | Positive        |
| 7   | LPS 163 | 44      | M   | WDLPS    | Reccurent              | Omental                         | 28x23     | present  | Positive        |
| 8   | LPS 249 | 45      | M   | WDLPS    | Reccurent              | Retroperitoneum<br>and omentum  | 7.6x6.5   | absent   | Positive        |
| 9   | LPS 331 | 44      | F   | WDLPS    | Primary                | Retroperitoneum                 | 36x24x7   | absent   | Positive        |
| 10  | LPS 809 | 63      | M   | WDLPS    | Reccurent              | inguinal                        | 7x5x4     | absent   | Positive        |
| 11  | LPS 822 | 52      | M   | DDLPS    | Reccurent              | Retroperitoneum                 | 10x8x7    | <50%     | Positive        |
| 12  | LPS 706 | 50      | F   | DDLPS    | Reccurent              | Retroperitoneum,<br>small bowel | 49x30x11  | <50%     | Positive        |
| 13  | LPS 697 | 38      | M   | DDLPS    | Primary                | Retroperitoneum                 | 15x12x9   | absent   | Positive        |
| 14  | LPS 216 | 68      | M   | DDLPS    | Reccurent              | Kidney                          | 14x13x13  | present  | Positive        |
